# Supplementary material for: Tetanus Vaccination and Extra-Immunization among Adult Populations: Eight-Year Follow Up Cohort Study of 771,443 Adults in Taiwan, 2006–2013
Source: MDPI journal article supplement (doi:10.3390/ijerph15081622), 2018-08-01
Supplement: s1 [file s1]

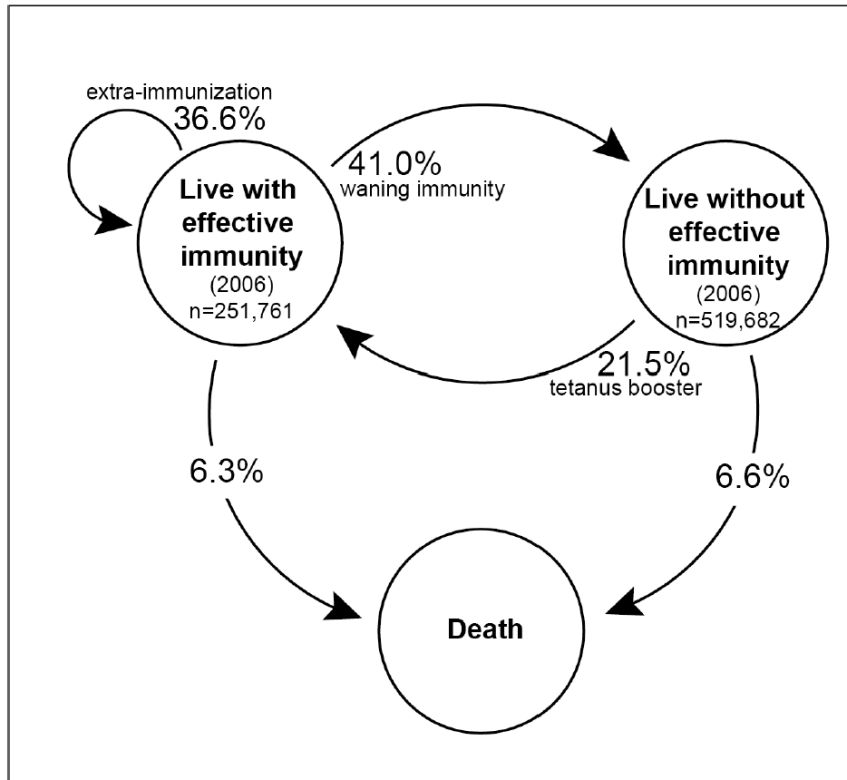

**Figure S1.** Interval change of immunity status against tetanus among adults aged between 20 and 79 years in Taiwan before and after 8-year-follow-up. (2006–2013; n = 771,443)
